# Supplementary material for: Graphene-intercalated Fe2O3/TiO2 heterojunctions for efficient photoelectrolysis of water
Source: Royal Society of Chemistry journal article supplement (doi:10.1039/c5ra18330h), 2015-01-01
Supplement: c5ra18330h1.pdf [file c5ra18330h1.pdf]

Supplementary Information

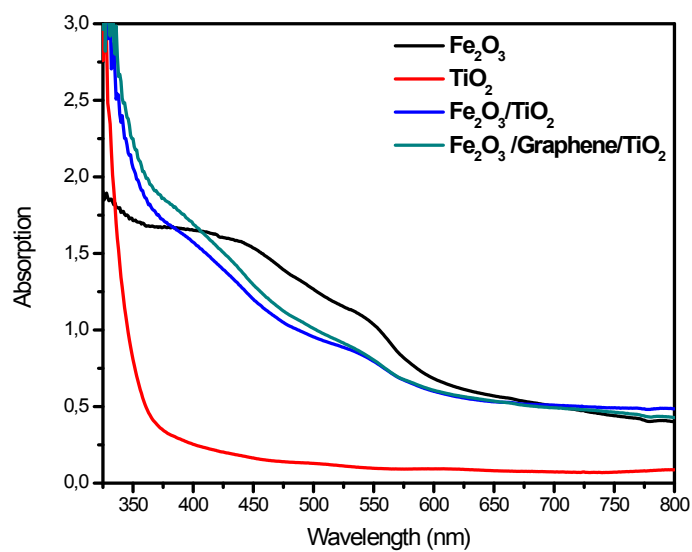

Figure S1 UV-Vis absorption spectra of  $\alpha\text{-Fe}_2\text{O}_3$ ,  $\text{TiO}_2$ ,  $\alpha\text{-Fe}_2\text{O}_3/\text{TiO}_2$  and  $\alpha\text{-Fe}_2\text{O}_3/\text{Graphene}/\text{TiO}_2$  photoanodes
